# Supplementary figures and images for: Ultra-trace cadmium determination in eucalyptus and rosemary tea samples using a novel method: deep eutectic solvent based magnetic nanofluid liquid phase microextraction-slotted quartz tube-flame atomic absorption spectrometry
Source: Royal Society of Chemistry journal article supplement (doi:10.1039/d0ja00276c), 2020-01-01

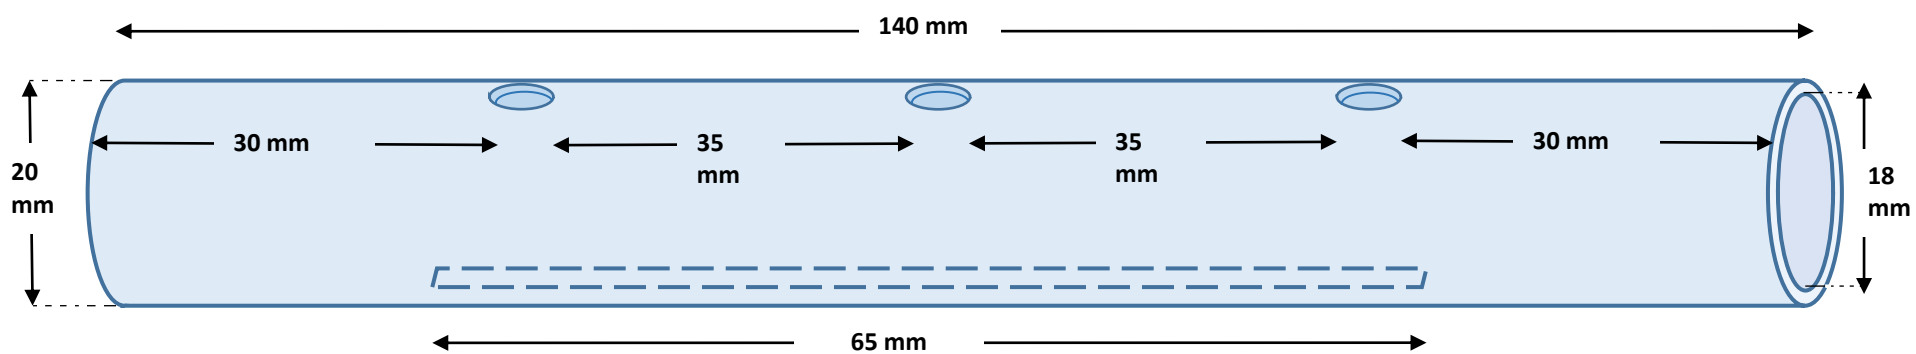

Slotted Quartz Tube used in the system

Supplement: d0ja00276c1.pdf [file d0ja00276c1.pdf]
